# Supplementary material for: One-step fabrication of three-dimensional macropore copolymer-modified polycarbonate array by photo-crosslinking for protein immunoassay
Source: Royal Society of Chemistry journal article supplement (doi:10.1039/d3ra00696d), 2023-01-01
Supplement: d3ra00696d1.pdf [file d3ra00696d1.pdf]

## Supporting Information

### One-step fabrication of three-dimensional macropore copolymer-modified polycarbonate array by photo-crosslinking for protein immunoassay

Kaimei Peng,<sup>a,b</sup> Runping Wang,<sup>a</sup> Jianhua, Zhou<sup>b,\*</sup>

<sup>a</sup> School of Chemistry and Chemical Engineering, Qiannan Normal University for Nationalities, Duyun 558000, China

<sup>b</sup> Key Laboratory of Sensing Technology and Biomedical Instruments of Guangdong Province School of Biomedical Engineering, Sun Yat-sen University, Guangzhou 510275, China

#### CONTENTS

Figure S1 The calibration curve for evaluation of immobilization density of FITC-IgG.

Figure S2 <sup>1</sup>H-NMR spectra of PSMBDA<sub>10-40</sub>, PSMDA, and PSMBD.

Figure S3 UV/vis absorption spectra of copolymer aqueous solution (0.38 mg/mL) at different UV illumination times (365 nm, 80 mW/cm<sup>2</sup>).

Figure S4 SEM images of the modified PC film prepared with (A) PSMBD, (B) PSMBDA<sub>10</sub>, (C) PSMBDA<sub>20</sub>, (D) PSMBDA<sub>30</sub>, (E) PSMBDA<sub>40</sub>, and (F) PSMDA in 10 mM PBS. All polymers are at a concentration of 25 mg/mL.

Figure S5 SEM images of the modified (A) PE, (B) PET, (C) PMMA, (D) PS, (E) PVC, or (F) PP film prepared with 25 mg/mL PSMBDA<sub>30</sub> in 10 mM PBS.

Figure S6 The porosity (A) and pore size distribution (B–F) of copolymer PSMBD, PSMBDA<sub>10</sub>, PSMBDA<sub>20</sub>, PSMBDA<sub>30</sub> and PSMBDA<sub>40</sub>, respectively.

Figure S7 (A) The film thickness of different copolymer (PSMBDA<sub>30</sub>) concentrations, and SEM images of the modified PC film prepared with (B) 5 mg/mL, (C) 13 mg/mL, (D) 25 mg/mL, (E) 40 mg/mL, and (F) 50 mg/mL PSMBDA<sub>30</sub> in 10 mM PBS, respectively.

Figure S8 Water contact angle images of pristine PC (A), PSMBDA<sub>10</sub> (B), PSMBDA<sub>20</sub> (C), PSMBDA<sub>30</sub> (D), PSMBDA<sub>40</sub> (E), PSMDA (F), and PSMBD (G) modified PC film.

Figure S9 Fluorescence images of PSMBDA<sub>30</sub> PBS solution modified PC film (3D surface) and PSMBDA<sub>30</sub> aqueous solution modified PC film (2D surface) under different FITC-IgG concentrations.

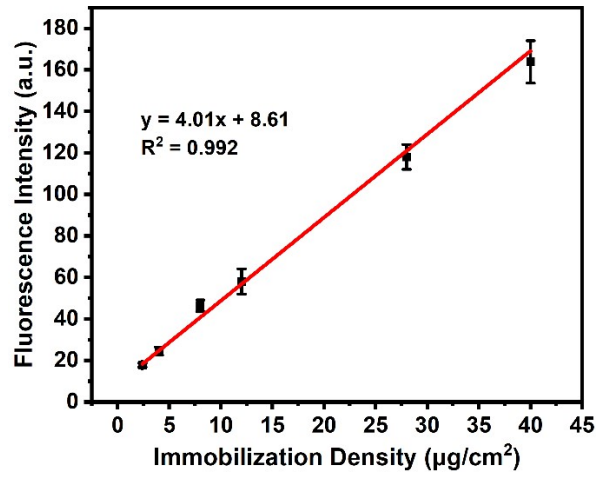

Figure S1 The calibration curve for evaluation of immobilization density of FITC-IgG.

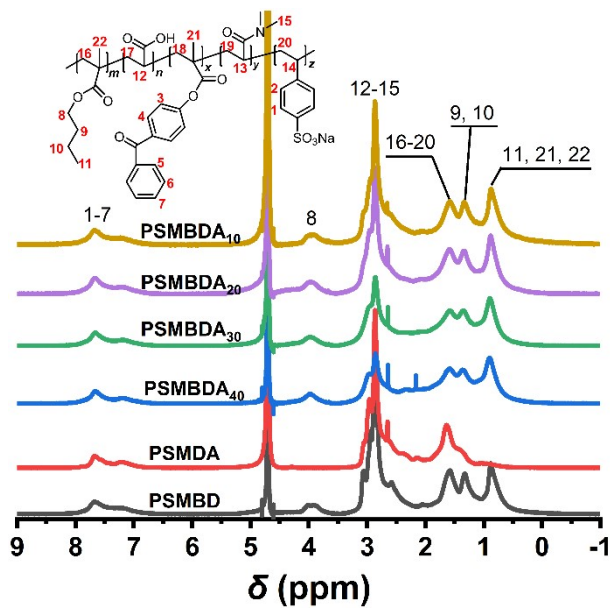

Figure S2 <sup>1</sup>H-NMR spectra of PSMBDA<sub>10-40</sub>, PSMDA, and PSMBD.

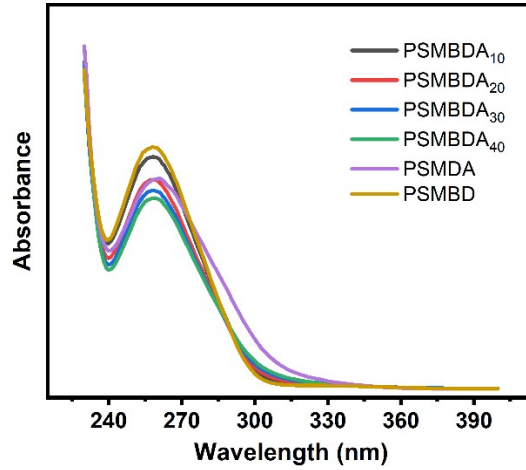

Figure S3 UV/vis absorption spectra of copolymer aqueous solution (0.38 mg/mL) at different UV illumination times (365 nm, 80 mW/cm<sup>2</sup>).

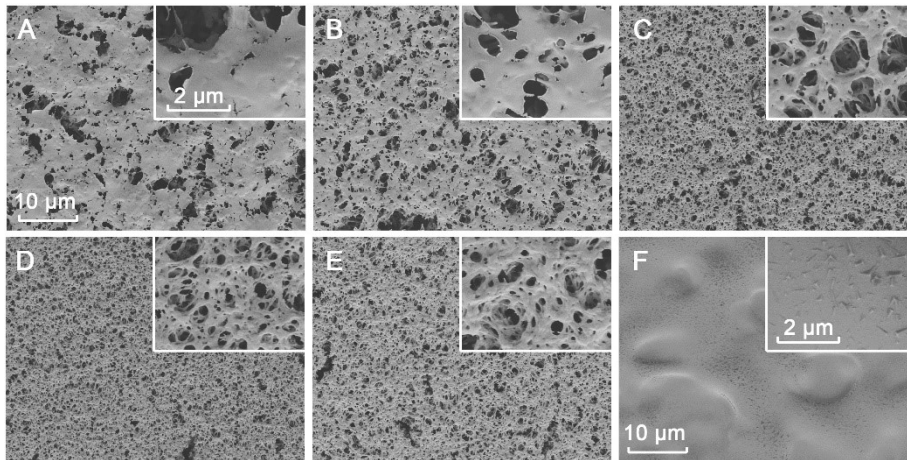

Figure S4 SEM images of the modified PC film prepared with (A) PSMBD, (B) PSMBDA<sub>10</sub>, (C) PSMBDA<sub>20</sub>, (D) PSMBDA<sub>30</sub>, (E) PSMBDA<sub>40</sub>, and (F) PSMDA in 10 mM PBS. All polymers are at a concentration of 25 mg/mL.

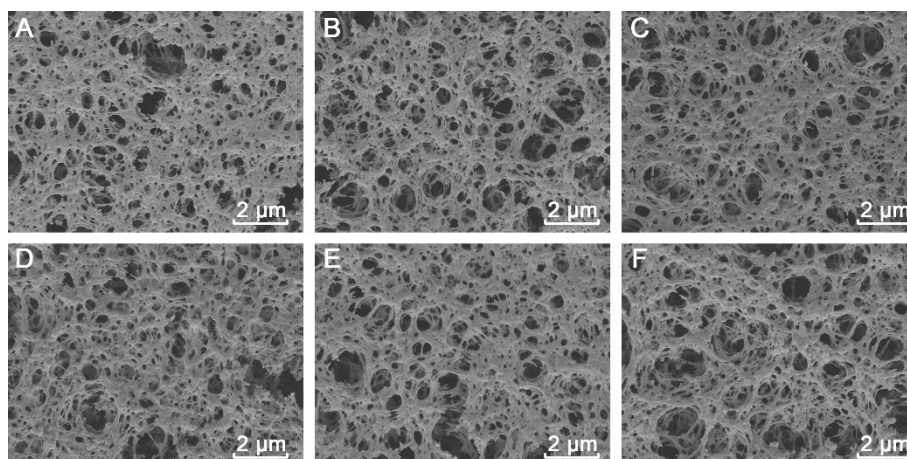

Figure S5 SEM images of the modified (A) PE, (B) PET, (C) PMMA, (D) PS, (E) PVC, or (F) PP film prepared with 25 mg/mL PSMBDA<sub>30</sub> in 10 mM PBS.

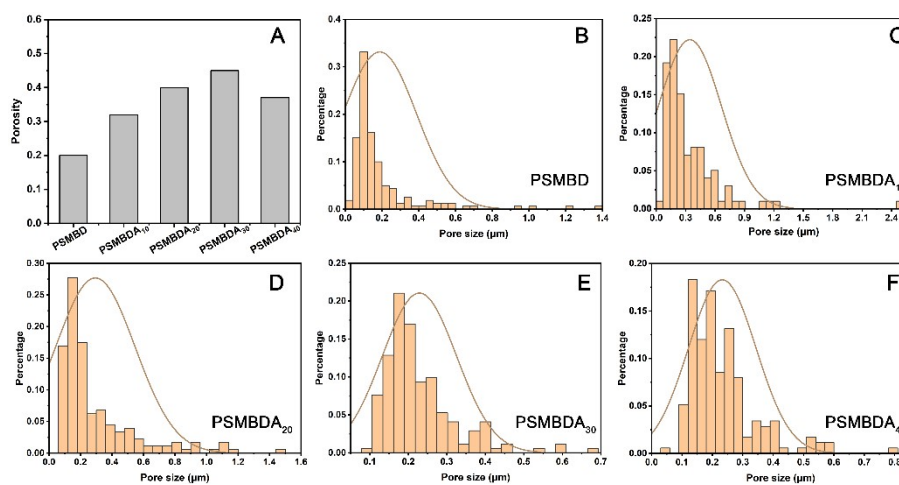

Figure S6 The porosity (A) and pore size distribution (B–F) of copolymer PSMBD, PSMBDA<sub>10</sub>, PSMBDA<sub>20</sub>, PSMBDA<sub>30</sub> and PSMBDA<sub>40</sub>, respectively.

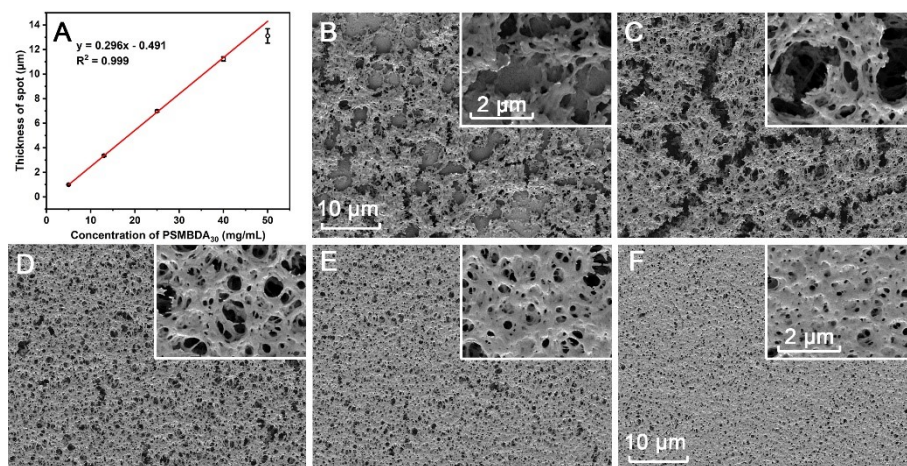

Figure S7 (A) The film thickness of different copolymer (PSMBDA<sub>30</sub>) concentrations, and SEM images of the modified PC film prepared with (B) 5 mg/mL, (C) 13 mg/mL, (D) 25 mg/mL, (E) 40 mg/mL, and (F) 50 mg/mL PSMBDA<sub>30</sub> in 10 mM PBS, respectively.

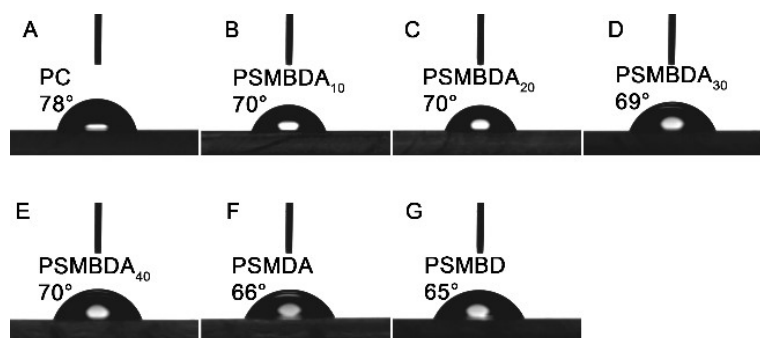

Figure S8 Water contact angle images of pristine PC (A), PSMBDA<sub>10</sub> (B), PSMBDA<sub>20</sub> (C), PSMBDA<sub>30</sub> (D), PSMBDA<sub>40</sub> (E), PSMDA (F), and PSMBD (G) modified PC film.

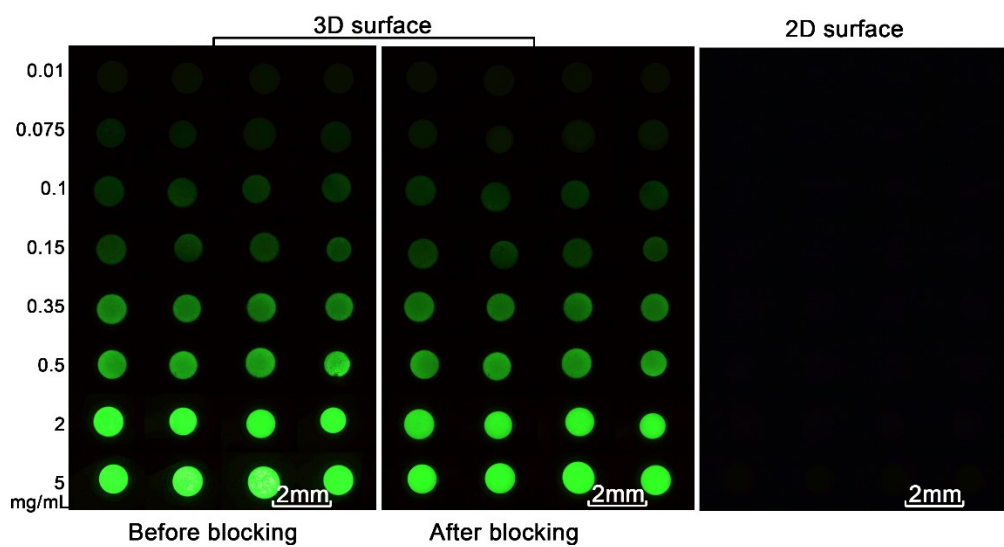

Figure S9 Fluorescence images of PSMBDA<sub>30</sub> PBS solution modified PC film (3D surface), and PSMBDA<sub>30</sub> aqueous solution modified PC film (2D surface) under different FITC-IgG concentrations.
